# Supplementary material
Source: PubMed Central journal article supplement (PMC5330850)
Supplement: NIHMS847365-supplement.pdf [file NIHMS847365-supplement.pdf]

## Clinical details for the 31 patients used in this study

| METHYLATION IN SKIN BIOPSIES (n = 8) |     |     |                   |                     |                           |                               |                              |                              |
|--------------------------------------|-----|-----|-------------------|---------------------|---------------------------|-------------------------------|------------------------------|------------------------------|
| LTCP                                 | AGE | SEX | NUMBER OF LESIONS | LESION LOCALIZATION | DURATION OF LESION (DAYS) | DIAMETERS OF MAIN LESION (MM) | MEAN DIAMETER OF MAIN LESION | NUMBER OF ANTIMONIUM COURSES |
| 25208                                | 51  | M   | 1                 | Thorax              | 40                        | 5x6                           | 5.5                          | 1 (cured)                    |
| 25222                                | 47  | M   | 1                 | Right lower limb    | 30                        | 5x4                           | 4.5                          | 1 (abandoned treatment)      |
| 25253                                | 52  | F   | 2                 | Left upper limb     | 60                        | 8x8                           | 8                            | 2 (abandoned treatment)      |
| 25319                                | 26  | M   | 1                 | Right lower limb    | 30                        | 25x25                         | 25                           | 1 (abandoned treatment)      |
| 25355                                | 51  | M   | 1                 | Left lower limb     | 21                        | 16x15                         | 15.5                         | 2 (cured)                    |
| 25396                                | 57  | M   | 1                 | Right lower limb    | 15                        | 20x15                         | 17.5                         | 2 (abandoned treatment)      |
| 25555                                | 25  | F   | 3                 | Neck                | 210                       | 25x50                         | 37.5                         | 1 (abandoned treatment)      |
| 25430                                | 16  | M   | 1                 | Right upper limb    | 30                        | 15x12                         | 13.5                         | 2 (cured)                    |

| GENE EXPRESSION IN SKIN BIOPSIES (n = 17) |     |     |                   |                           |                           |                               |                              |                              |
|-------------------------------------------|-----|-----|-------------------|---------------------------|---------------------------|-------------------------------|------------------------------|------------------------------|
| LTCP                                      | AGE | SEX | NUMBER OF LESIONS | LESION LOCALIZATION       | DURATION OF LESION (DAYS) | DIAMETERS OF MAIN LESION (MM) | MEAN DIAMETER OF MAIN LESION | NUMBER OF ANTIMONIUM COURSES |
| 25195                                     | 28  | M   | 1                 | Right lower limb          | 15                        | 9x8                           | 8.5                          | 2 (cured)                    |
| 25177                                     | 24  | F   | 1                 | Thorax                    | 60                        |                               |                              |                              |
| 25208                                     | 51  | M   | 1                 | Thorax                    | 40                        | 5x6                           | 5.5                          | 1 (cured)                    |
| 25222                                     | 47  | M   | 1                 | Right lower limb          | 30                        | 5x4                           | 4.5                          | 1 (abandoned treatment)      |
| 25252                                     | 25  | F   | 1                 | Left lower limb           | 13                        | 20x20                         | 20                           | 1 (cured)                    |
| 25253                                     | 52  | F   | 2                 | Left upper limb           | 60                        | 8x8                           | 8                            | 2 (abandoned treatment)      |
| 25254                                     | 23  | M   | 3                 | Right lower limb          | 60                        | 34x30                         | 32                           | 2 (abandoned treatment)      |
| 25319                                     | 26  | M   | 1                 | Right lower limb          | 30                        | 25x25                         | 25                           | 1 (abandoned treatment)      |
| 25346                                     | 55  | M   | 1                 | Left lower limb           | 40                        | 15x15                         | 15                           | 1 (abandoned treatment)      |
| 25355                                     | 51  | M   | 1                 | Left lower limb           | 21                        | 16x15                         | 15.5                         | 2 (cured)                    |
| 25356                                     | 40  | M   | 1                 | Left lower limb           | 18                        | 15x15                         | 15                           | 2 (abandoned treatment)      |
| 25361                                     | 29  | M   | 1                 | Left lower limb           | 25                        | 10x10                         | 10                           | 1 (abandoned treatment)      |
| 25381                                     | 33  | M   | 3                 | lower limb and left upper | 60                        | 19x20                         | 19.5                         | 1 (cured)                    |
| 25396                                     | 57  | M   | 1                 | Right lower limb          | 15                        | 20x15                         | 17.5                         | 2 (abandoned treatment)      |
| 25457                                     | 23  | M   | 1                 | Left lower limb           | 30                        | 22x20                         | 21                           | 2 (abandoned treatment)      |
| 25555                                     | 25  | F   | 3                 | Neck                      | 210                       | 25x50                         | 37.5                         | 1 (abandoned treatment)      |
| 25430                                     | 16  | M   | 1                 | Right upper limb          | 30                        | 15x12                         | 13.5                         | 2 (cured)                    |

| GENE EXPRESSION IN MACROPHAGES NOT TREATED WITH IL-6 (n = 21) |     |     |                   |                           |                           |                               |                              |                              |
|---------------------------------------------------------------|-----|-----|-------------------|---------------------------|---------------------------|-------------------------------|------------------------------|------------------------------|
| LTCP                                                          | AGE | SEX | NUMBER OF LESIONS | LESION LOCALIZATION       | DURATION OF LESION (DAYS) | DIAMETERS OF MAIN LESION (MM) | MEAN DIAMETER OF MAIN LESION | NUMBER OF ANTIMONIUM COURSES |
| 25195                                                         | 28  | M   | 1                 | Right lower limb          | 15                        | 9x8                           | 8.5                          | 2 (cured)                    |
| 25208                                                         | 51  | M   | 1                 | Thorax                    | 40                        | 5x6                           | 5.5                          | 1 (cured)                    |
| 25222                                                         | 47  | M   | 1                 | Right lower limb          | 30                        | 5x4                           | 4.5                          | 1 (abandoned treatment)      |
| 25252                                                         | 25  | F   | 1                 | Left lower limb           | 13                        | 20x20                         | 20                           | 1 (cured)                    |
| 25253                                                         | 52  | F   | 2                 | Left upper limb           | 60                        | 8x8                           | 8                            | 2 (abandoned treatment)      |
| 25254                                                         | 23  | M   | 3                 | Right lower limb          | 60                        | 34x30                         | 32                           | 2 (abandoned treatment)      |
| 25319                                                         | 26  | M   | 1                 | Right lower limb          | 30                        | 25x25                         | 25                           | 1 (abandoned treatment)      |
| 25346                                                         | 55  | M   | 1                 | Left lower limb           | 40                        | 15x15                         | 15                           | 1 (abandoned treatment)      |
| 25355                                                         | 51  | M   | 1                 | Left lower limb           | 21                        | 16x15                         | 15.5                         | 2 (cured)                    |
| 25356                                                         | 40  | M   | 1                 | Left lower limb           | 18                        | 15x15                         | 15                           | 2 (abandoned treatment)      |
| 25361                                                         | 29  | M   | 1                 | Left lower limb           | 25                        | 10x10                         | 10                           | 1 (abandoned treatment)      |
| 25381                                                         | 33  | M   | 3                 | lower limb and left upper | 60                        | 19x20                         | 19.5                         | 1 (cured)                    |
| 25396                                                         | 57  | M   | 1                 | Right lower limb          | 15                        | 20x15                         | 17.5                         | 2 (abandoned treatment)      |
| 25457                                                         | 23  | M   | 1                 | Left lower limb           | 30                        | 22x20                         | 21                           | 2 (abandoned treatment)      |
| 25555                                                         | 25  | F   | 3                 | Neck                      | 210                       | 25x50                         | 37.5                         | 1 (abandoned treatment)      |
| 25430                                                         | 16  | M   | 1                 | Right upper limb          | 30                        | 15x12                         | 13.5                         | 2 (cured)                    |
| 25637                                                         | 55  | F   | 2                 | lower limb and left lower | 60                        | 25x12                         | 18.5                         | 1 (abandoned treatment)      |
| 25583                                                         | 20  | M   | 1                 | Right lower limb          | 20                        | 5x7                           | 6                            | 1 (abandoned treatment)      |
| 25465                                                         | 23  | M   | 2                 | Right lower limb          | 15                        | 8x6                           | 7                            | 2 (cured)                    |
| 25612                                                         | 19  | F   | 2                 | Left lower limb           | 15                        | 18x19                         | 18.5                         | 2 (abandoned treatment)      |
| 25462                                                         | 17  | F   | 1                 | Right upper limb          | 30                        | 5x6                           | 5.5                          | 1 (cured)                    |

| GENE EXPRESSION IN MACROPHAGES TREATED WITH IL-6 (n = 9) |     |     |                   |                           |                           |                               |                              |                              |
|----------------------------------------------------------|-----|-----|-------------------|---------------------------|---------------------------|-------------------------------|------------------------------|------------------------------|
| LTCP                                                     | AGE | SEX | NUMBER OF LESIONS | LESION LOCALIZATION       | DURATION OF LESION (DAYS) | DIAMETERS OF MAIN LESION (MM) | MEAN DIAMETER OF MAIN LESION | NUMBER OF ANTIMONIUM COURSES |
| 25883                                                    | 22  | M   | 1                 | Right lower limb          | 40                        | 16x12                         | 14                           | 1 (cured)                    |
| 25890                                                    | 29  | F   | 1                 | Left lower limb           | 30                        | 15x15                         | 15                           | 1 (cured)                    |
| 25898                                                    | 23  | M   | 1                 | Right lower limb          | 20                        | 15x15                         | 15                           | 2 (cured)                    |
| 26002                                                    | 25  | M   | 2                 | Left lower limb           | 60                        | 40x34                         | 37                           | 1 (cured)                    |
| 26003                                                    | 17  | F   | 3                 | lower limb and left upper | 21                        | 6x5                           | 5.5                          | 1 (cured)                    |
| 26022                                                    | 47  | F   | 1                 | Ear                       | 21                        | 5x5                           | 5                            | 1 (abandoned treatment)      |
| 26091                                                    | 27  | M   | 1                 | Right lower limb          | 30                        | 15x10                         | 12.5                         | 1 (cured)                    |
| 26094                                                    | 40  | M   | 1                 | Left lower limb           | 30                        | 20x20                         | 20                           | 1 (abandoned treatment)      |
| 26107                                                    | 38  | M   | 4                 | Right lower limb          | 40                        | 45x30                         | 37.5                         | 3 (in treatment)             |

**Clinical details for the 31 patients used in this study**

| <b>METHYLATION IN MACROPHAGES NOT TREATED WITH IL-6 (n = 9)</b> |     |     |                   |                           |                           |                               |                              |                              |
|-----------------------------------------------------------------|-----|-----|-------------------|---------------------------|---------------------------|-------------------------------|------------------------------|------------------------------|
| LTCP                                                            | AGE | SEX | NUMBER OF LESIONS | LESION LOCALIZATION       | DURATION OF LESION (DAYS) | DIAMETERS OF MAIN LESION (MM) | MEAN DIAMETER OF MAIN LESION | NUMBER OF ANTIMONIUM COURSES |
| 25254                                                           | 23  | M   | 3                 | Right lower limb          | 60                        | 34x30                         | 32                           | 2 (abandoned treatment)      |
| 25361                                                           | 29  | M   | 1                 | Left lower limb           | 25                        | 10x10                         | 10                           | 1 (abandoned treatment)      |
| 25381                                                           | 33  | M   | 3                 | lower limb and left upper | 60                        | 19x20                         | 19.5                         | 1 (cured)                    |
| 25396                                                           | 57  | M   | 1                 | Right lower limb          | 15                        | 20x15                         | 17.5                         | 2 (abandoned treatment)      |
| 25457                                                           | 23  | M   | 1                 | Left lower limb           | 30                        | 22x20                         | 21                           | 2 (abandoned treatment)      |
| 25555                                                           | 25  | F   | 3                 | Neck                      | 210                       | 25x50                         | 22.5                         | 1 (abandoned treatment)      |
| 25430                                                           | 16  | M   | 1                 | Right upper limb          | 30                        | 15x12                         | 13.5                         | 2 (cured)                    |
| 25465                                                           | 23  | M   | 2                 | Right lower limb          | 15                        | 8x6                           | 7                            | 2 (cured)                    |
| 25637                                                           | 55  | F   | 2                 | lower limb and left lower | 60                        | 25x12                         | 18.5                         | 1 (abandoned treatment)      |

| <b>METHYLATION IN MACROPHAGES TREATED WITH IL-6 (n = 5)</b> |     |     |                   |                           |                           |                               |                              |                              |
|-------------------------------------------------------------|-----|-----|-------------------|---------------------------|---------------------------|-------------------------------|------------------------------|------------------------------|
| LTCP                                                        | AGE | SEX | NUMBER OF LESIONS | LESION LOCALIZATION       | DURATION OF LESION (DAYS) | DIAMETERS OF MAIN LESION (MM) | MEAN DIAMETER OF MAIN LESION | NUMBER OF ANTIMONIUM COURSES |
| 25883                                                       | 22  | M   | 1                 | Right lower limb          | 40                        | 16x12                         | 14                           | 1 (cured)                    |
| 25898                                                       | 23  | M   | 1                 | Right lower limb          | 20                        | 15x15                         | 15                           | 2 (cured)                    |
| 26002                                                       | 25  | M   | 2                 | Left lower limb           | 60                        | 40x34                         | 37                           | 1 (cured)                    |
| 26003                                                       | 17  | F   | 3                 | lower limb and left upper | 21                        | 6x5                           | 5.5                          | 1 (cured)                    |
| 26022                                                       | 47  | F   | 1                 | Ear                       | 21                        | 5x5                           | 5                            | 1 (abandoned treatment)      |
